# Supplementary material for: The messages presented in online electronic cigarette promotions and discussions: a scoping review protocol
Source: PubMed Central journal article supplement — BMJ Open. 2017 Nov 8;7(11):e018633. doi: 10.1136/bmjopen-2017-018633 (PMC5695349; doi:10.1136/bmjopen-2017-018633), 2017-11-08
Supplement: bmjopen-2017-018633.draft_revisions.pdf [file bmjopen-2017-018633.draft_revisions.pdf]

# BMJ Open

BMJ Open is committed to open peer review. As part of this commitment we make the peer review history of every article we publish publicly available.

When an article is published we post the peer reviewers' comments and the authors' responses online. We also post the versions of the paper that were used during peer review. These are the versions that the peer review comments apply to.

The versions of the paper that follow are the versions that were submitted during the peer review process. They are not the versions of record or the final published versions. They should not be cited or distributed as the published version of this manuscript.

BMJ Open is an open access journal and the full, final, typeset and author-corrected version of record of the manuscript is available on our site with no access controls, subscription charges or pay-per-view fees (<http://bmjopen.bmj.com>).

If you have any questions on BMJ Open's open peer review process please email [editorial.bmjopen@bmj.com](mailto:editorial.bmjopen@bmj.com)

# BMJ Open

## The messages presented in online electronic cigarette promotions and discussions: A scoping review protocol

|                                 |                                                                                                                                                                                                                                                                                                                                           |
|---------------------------------|-------------------------------------------------------------------------------------------------------------------------------------------------------------------------------------------------------------------------------------------------------------------------------------------------------------------------------------------|
| Journal:                        | <i>BMJ Open</i>                                                                                                                                                                                                                                                                                                                           |
| Manuscript ID                   | bmjopen-2017-018633                                                                                                                                                                                                                                                                                                                       |
| Article Type:                   | Protocol                                                                                                                                                                                                                                                                                                                                  |
| Date Submitted by the Author:   | 11-Jul-2017                                                                                                                                                                                                                                                                                                                               |
| Complete List of Authors:       | McCausland, Kahlia; Curtin University - Perth City Campus, Collaboration for Evidence, Research and Impact in Public Health, School of Public Health<br>Maycock, Bruce; Curtin University, School of Public Health<br>Jancey, Jonine; Curtin University, Western Australian Centre for Health Promotion Research, School of Public Health |
| <b>Primary Subject Heading</b>: | Public health                                                                                                                                                                                                                                                                                                                             |
| Secondary Subject Heading:      | Health policy, Research methods, Smoking and tobacco                                                                                                                                                                                                                                                                                      |
| Keywords:                       | Protocols & guidelines < HEALTH SERVICES ADMINISTRATION & MANAGEMENT, electronic cigarettes, PUBLIC HEALTH, public policy, social media, marketing                                                                                                                                                                                        |
|                                 |                                                                                                                                                                                                                                                                                                                                           |

SCHOLARONE™  
Manuscripts

1  
2  
3 **The messages presented in online electronic cigarette promotions and discussions: A scoping**  
4 **review protocol**  
5

6 Kahlia McCausland<sup>1</sup>

7 Bruce Maycock<sup>1</sup>

8 Jonine Jancey<sup>1</sup>  
9  
10

11  
12 1 Collaboration for Evidence, Research and Impact in Public Health, School of Public Health, Faculty  
13 of Health Science, Curtin University, Perth, Western Australia  
14

15  
16 Ms Kahlia McCausland (*Corresponding Author*)

17 Collaboration for Evidence, Research and Impact in Public Health, School of Public Health, Faculty of  
18 Health Science, Curtin University, Perth, Western Australia

19 Postal address: Collaboration for Evidence, Research and Impact in Public Health, School of Public  
20 Health, Curtin University, GPO Box U1987, Western Australia 6845, Australia  
21

22 Telephone: +61 08 9266 7382

23 Email: [kahlia.mccausland@curtin.edu.au](mailto:kahlia.mccausland@curtin.edu.au)  
24  
25

26  
27 Professor Bruce Maycock

28 Collaboration for Evidence, Research and Impact in Public Health, School of Public Health, Faculty of  
29 Health Science, Curtin University, Perth, Western Australia  
30

31  
32 Associate Professor Jonine Jancey

33 Collaboration for Evidence, Research and Impact in Public Health, School of Public Health, Faculty of  
34 Health Science, Curtin University, Perth, Western Australia  
35  
36

37  
38 Word count: 2213  
39  
40  
41

42 **ABSTRACT**  
43

44 **Introduction:** Electronic cigarettes have become increasingly popular over the last ten years. These  
45 devices represent a new paradigm for tobacco control offering smokers an opportunity to inhale  
46 nicotine without inhaling tobacco smoke. To date there are no definite conclusions regarding the  
47 safety and long term health effects of electronic cigarettes, however, there is evidence that they are  
48 being marketed online as a healthier alternative to traditional cigarettes. This scoping review aims to  
49 identify and describe the breadth of messages (e.g. health, smoking-cessation and price related  
50 claims) presented in online electronic cigarette promotions and discussions.  
51  
52

53  
54 **Methods and analysis:** A scoping review will be undertaken adhering to the methodology outlined in  
55 The Joanna Briggs Institute Manual for Scoping Reviews. Six key electronic databases will be  
56 searched to identify eligible studies. Studies must be published in English between 2007 and 2017,  
57  
58  
59  
60

1  
2  
3 examine and/or analyse content captured from online electronic cigarette promotions or discussions,  
4 and report results for electronic cigarettes separately to other forms of tobacco delivery. Studies will  
5 be screened initially by title and abstract, followed by full-text review. Results of the search strategy  
6 will be reported in a PRISMA flow diagram and presented in tabular form with accompanying narrative  
7 summary.  
8  
9

10 **Ethics and dissemination:** The methodology consists of reviewing and collecting data from publicly  
11 available studies, and therefore does not require ethics approval. Results will be published in a peer  
12 reviewed journal and be presented at national/international conferences. The results will be  
13 disseminated via social media and online platforms. Advocacy will be key to informing policy makers  
14 of regulatory and health issues that need to be addressed.  
15  
16

17 **Registration details:** The review was registered prospectively with The Joanna Briggs Institute  
18 Systematic Reviews database.  
19  
20

### 21 **Strengths and limitations of this study**

- 22 • This is the first scoping review to investigate what messages are being presented online in  
23 electronic cigarette promotions and discussions.
- 24 • The review will adhere to the methodology outlined in the Manual for Scoping Reviews by The  
25 Joanna Briggs Institute.
- 26 • The review will not assess the quality of the evidence identified from the literature, rather  
27 provide an overview of the existing evidence, regardless of quality.
- 28 • Multiple strategies will be employed to facilitate wide dissemination of the results.  
29  
30  
31  
32  
33

34 **KEYWORDS:** electronic cigarettes; marketing; social media; public health; public policy  
35  
36  
37

## 38 **INTRODUCTION**

39  
40 The availability of less toxic forms of nicotine delivery represents a new paradigm for tobacco control,  
41 offering smokers an opportunity to inhale nicotine without inhaling tobacco smoke.[1, 2] The evident  
42 proliferation of alternative nicotine delivery devices, particularly electronic cigarettes, suggests that  
43 these devices may be perceived as a healthier alternative to traditional cigarettes.[3-5] However,  
44 there remains numerous unanswered questions regarding the overall public health benefits of these  
45 devices. Concerns have been raised about their effectiveness as a smoking cessation intervention,  
46 with dual use of cigarettes and electronic cigarettes potentially maintaining cigarette addiction;[6-9]  
47 their facilitation of smoking uptake among youth;[7, 10] the possible harms from device  
48 malfunctions;[11, 12] and the potential health risks associated with their use.[13] These issues  
49 underscore the urgent need for research that will inform policies and regulations for electronic  
50 cigarettes and other new and emerging nicotine delivery devices.  
51  
52  
53  
54

55  
56 Electronic cigarettes (also commonly known as e-cigarettes) are battery-powered devices that heat a  
57 solution, known as juice or e-liquid, typically containing nicotine, which generates a vapour for  
58  
59  
60

1  
2  
3 inhalation.[14] E-liquid is available in a range of flavours including butterscotch, cherry choc, and  
4 vanilla,[15] many of which appeal to youth.[16, 17] Studies have found wide variability in the level of  
5 nicotine delivered by these products,[18-20] device quality (e.g. airflow rate, aerosol production,  
6 leaking e-liquid cartridges) and labelling,[19, 21] and have connected electronic cigarette use with  
7 nicotine addiction, respiratory damage, aortic stiffness and intake of carcinogenic heavy metals.[22-  
8 26]

9  
10  
11 The International Tobacco Control Policy Evaluation Project is the first international cohort study of  
12 tobacco use.[27] The project's objective is to measure the psychosocial and behavioural impact of key  
13 national level policies of the WHO Framework Convention on Tobacco Control.[28] It is a collaborative  
14 effort with international health organisations and policymakers in more than 25 countries thus far.[29]  
15 Data from the project has confirmed, as well as extended understanding of the level of awareness  
16 and use of electronic cigarettes in high-income countries.[30] The data are consistent with results  
17 from the HealthStyles[31] and ConsumerStyles[32] surveys conducted in the United States providing  
18 further evidence of increasing levels of electronic cigarette awareness and use over the last decade.  
19 Australian data from the International Tobacco Control Project have shown that awareness of  
20 electronic cigarettes increased from 20% in 2010 to 66% in 2013, and self-reported use from 1% in  
21 2010 to 7% in 2013,[33] even though the sale, purchase and marketing of electronic cigarettes was  
22 (and continues to be) prohibited.[34]

23  
24  
25 The promotion of electronic cigarettes has been increasing[35] with evidence of substantial  
26 investment from tobacco and other industry groups using websites, social media and other non-  
27 traditional marketing methods to increase the electronic cigarette market.[10, 36, 37] Electronic  
28 cigarettes are being advertised as a harm reduction alternative[10, 36] and promoted in a way to  
29 create a vaping culture that appeals to youth (even non-smokers),[38, 39] potentially supporting the  
30 creation of a whole new generation of nicotine addicted young people, serving as a gateway to  
31 tobacco use, and possibly normalising not only vaping but also renormalising smoking in public  
32 places.[40-42]

33  
34  
35 Consumer perceptions of electronic cigarettes' health risks and benefits are essential factors in  
36 determining uptake. Target groups adopting the product (e.g., past smokers, smokers attempting to  
37 quit, youth) and patterns of use impact on population health. Tobacco product adoption patterns are  
38 motivated and supported by tobacco industry marketing,[43] it is therefore imperative to understand  
39 the marketing consumers contend with. The internet remains a main channel for marketing electronic  
40 cigarette products.[44] Electronic cigarette retail websites and social media accounts present an  
41 assortment of explicit and implicit marketing claims, most commonly with regard to claims of health  
42 benefits, being less harmful than tobacco, and being able to assist in quitting smoking.[45-48] Claims  
43 of health benefits may undermine smoking cessation, and images that appeal to youth may prompt  
44 tobacco or electronic cigarette initiation.[48]

45  
46  
47 Very little is known about this emerging product, and there is a need for systematic research to  
48 understand the marketing drivers for the uptake of electronic cigarettes and how they are promoted  
49  
50  
51  
52  
53  
54  
55  
56  
57  
58  
59  
60

1  
2  
3 and accessed online. Only through this understanding can appropriate policies and regulations be  
4 developed. This scoping review aims to identify and describe the breadth of messages (e.g. health,  
5 smoking-cessation and price related claims) presented in online electronic cigarette promotions and  
6 discussions.  
7

## 8 9 **METHODS AND ANALYSIS**

### 10 11 **Study design**

12  
13 A scoping review will be undertaken to identify and describe the breadth of messages presented in  
14 online electronic cigarette promotions and discussions. Scoping reviews use a systematic process to  
15 map key concepts and types of evidence in an area of research, and for identifying gaps in an existing  
16 body of knowledge.[49-51] Scoping reviews tend to differ from systematic reviews in a number of  
17 ways and typically do not assess the quality of the studies included.[49, 51] This scoping review will  
18 adhere to the methodologically rigorous methods manual by The Joanna Briggs Institute (JBI).[52]  
19 The scoping review frameworks proposed by Arksey and O'Malley,[49] and Levac, Colquhoun and  
20 O'Brien[51] have been drawn upon in the development of the JBI methodology for scoping reviews.  
21 The JBI scoping review methodology consists of five parts: 1) Title, objective, and question; 2)  
22 Inclusion criteria; 3) Search strategy; 4) Extraction of the results; 5) Presentation of the results.  
23  
24

25  
26 A preliminary search of the literature was conducted in the following databases: JBI Database of  
27 Scoping Reviews and Implementation Reports, Cochrane Database of Systematic Reviews,  
28 PROSPERO International Prospective Register of Systematic Reviews, Database of Promoting  
29 Health Effectiveness Reviews (DoPHER) and Epistemonikos which confirmed that no systematic or  
30 scoping review has been published or is currently underway on this topic. The review has been  
31 prospectively registered with JBI Systematic Reviews database (May 2017). It is anticipated that the  
32 scoping review will be completed by October 2017.  
33  
34

### 35 36 37 **Title, objective, and question**

38  
39 Review title: *The messages presented in online electronic cigarette promotions and discussions: A*  
40 *scoping review protocol.* The title was guided by the "PCC" mnemonic (Population, Concept, and  
41 Context).[52] Using the PCC mnemonic enables the title to reflect key information about the focus and  
42 scope of the review to impending readers.  
43  
44

45  
46 Review objective: *This scoping review will identify and describe the breadth of messages presented in*  
47 *online electronic cigarette promotions and discussions.* The review objective is congruent with the title  
48 and specifies what the review aims to achieve.  
49  
50

51  
52 Review question: *What messages are presented in online electronic cigarette promotions and*  
53 *discussions?* The review objective includes the PCC elements and guides and directs the  
54 development of the inclusion criteria for the scoping review.  
55

### 56 57 **Inclusion criteria**

1  
2  
3 This scoping review will include studies that have examined and analysed content captured from  
4 online electronic cigarette promotions and discussions (e.g. social media: YouTube, Facebook,  
5 Instagram, Twitter, blogs; and websites: retail sites, discussion forums). The media reported in the  
6 study must be clearly identified (e.g. analysis of tweets from Twitter). Studies reporting multiple media  
7 will be excluded (e.g. analysis of tweets and posts from Twitter and Facebook respectively) unless the  
8 media are reported separately. Other tobacco product studies (e.g. traditional tobacco cigarette, snus,  
9 chewing tobacco or hookah) will be excluded unless electronic cigarettes are also examined in the  
10 study and reported separately. In addition, studies that do not distinguish between electronic  
11 cigarettes and other forms of tobacco delivery will be excluded. Studies examining promotions or  
12 discussions in traditional media (e.g. TV, newspaper, and magazine) will be excluded unless online  
13 media is also examined in the study and reported separately. Studies will be limited to the following  
14 countries: United Kingdom, United States of America, New Zealand, Australia, and Canada. These  
15 countries have been selected as they are all developed countries and electronic cigarette use is well  
16 established.[29] The review will consider only peer reviewed primary research studies. Systematic  
17 and literature reviews, grey literature, editorials and thesis publications will be excluded.

### 24 **Search strategy**

25  
26 The search strategy aims to identify peer reviewed primary research studies. Consultation with the  
27 Faculty Librarian identified five key databases: Medline, Scopus, ProQuest, Informit, and Google  
28 Scholar. A hand search of the Journal of Medical Internet Research will also be conducted to ensure  
29 no studies meeting the inclusion criteria are missed. Preliminary searches have located numerous  
30 articles published in this journal that are relevant to the review question. The first 200 results from  
31 Google Scholar will be examined for eligibility and subject to the screening process outlined below.

32  
33 An initial search of MEDLINE was undertaken, followed by an analysis of the text words contained in  
34 the title, abstract, and index terms used to describe the articles. This informed the development of the  
35 search strategy, including identified keywords and index terms. A comprehensive search using all the  
36 identified keywords and index terms will be undertaken across all databases. Lastly, the reference list  
37 of all literature subject to full text review will be screened for additional studies and assessed for  
38 suitability based on the studies title and abstract.

39  
40 The search will be limited to studies published in English in the last ten years (2007-2017), this period  
41 correlates with the approximate time that electronic cigarettes were first introduced to the United  
42 States and Europe.[53] The primary reviewer (KM) will contact authors of primary research studies if  
43 access to full text cannot be obtained. Studies reported as abstracts or for which full texts cannot be  
44 identified will be excluded from the review.

45  
46 The initial search terms are: ("electronic cigarette" OR e-cigarette OR "electronic nicotine delivery  
47 system" OR "personal vapo?ri?er" OR "electronic nicotine delivery device" OR "vape pen" OR  
48 "smokeless tobacco" OR "electric cigarette" OR "electric nicotine delivery system" OR "electric  
49 nicotine delivery device" OR e- hookah OR e-juice OR e-liquid OR vaping) AND ("social media" OR  
50 internet OR online OR YouTube OR Facebook OR Instagram OR Twitter OR "online media" OR



1  
2  
3 website OR e-mail OR blog OR “digital media” OR “social networking”) AND (“content analysis” OR  
4 “content evaluation” OR message OR meaning OR coding OR “media analysis” OR “textual  
5 analysis”).  
6

### 7 8 **Study selection**

9  
10 Studies will be assessed for inclusion based on the inclusion criteria, examined initially by title and  
11 abstract. Full text articles will be retrieved if they appear to meet the inclusion criteria or if further  
12 examination is required to determine eligibility. Two reviewers (KM and JJ) will independently screen  
13 all titles/abstracts to determine their eligibility. Full text screening will then be undertaken by the  
14 primary reviewer to further determine study eligibility for inclusion in the review. This process will be  
15 assisted by the online screening and data extraction tool – Covidence.[54] Any disagreements will be  
16 resolved through discussion with a third reviewer (BM).  
17  
18  
19

### 20 **Extraction of the results**

21  
22 The relevant content from each study will be extracted using a data extraction proforma (Appendix I).  
23 Data extracted will include: Author(s), year of publication, origin/country of study, aim/purpose of  
24 study, media reported, sample size, study design/methods, results, and key findings that relate to the  
25 review question. There will be no attempt to contact authors of primary research studies for which  
26 extraction information is not reported.  
27  
28

29  
30 To ensure inter-rater reliability, two reviewers (KM and JJ) independent of one another will chart the  
31 first five studies using the data extraction proforma and meet to determine whether their approach to  
32 data extraction is consistent with the research question and purpose. In addition this process will be  
33 used to refine and/or expand the data extraction proforma to ensure all relevant results are being  
34 extracted. Any changes made to the data extraction proforma will be reported on in the results  
35 publication. The primary reviewer will then extract data from the remaining studies unaccompanied.  
36  
37  
38

### 39 **Presentation of the results**

40  
41 The results of the search strategy will be presented in a PRISMA flow diagram indicating the number  
42 of articles found via each search method, the number of duplicates removed, and the number of  
43 studies excluded and included. A list of studies excluded after full text screening will be made  
44 available along with the main reason for exclusion.  
45  
46

47 To illustrate and summarise the main findings, results will be presented in tabular form (as per data  
48 extraction proforma), with an accompanying narrative summary describing how the results relate to  
49 the review objective and question.  
50

### 51 **ETHICS AND DISSEMINATION**

52  
53 The scoping review methodology consists of reviewing and collecting data from publicly available  
54 peer reviewed articles, therefore this study does not require ethics approval.  
55  
56  
57  
58  
59  
60



1  
2  
3 The results of the scoping review will be published in a peer reviewed journal. In addition the results  
4 will be presented at national/international conferences and symposia. Publications will be lodged on  
5 Research Gate and Academia to increase circulation. The expertise of the research team (health  
6 promotion, public health, knowledge translation) will support broad dissemination of the findings.  
7  
8

9 Given the sensitive nature of this research topic and the potential to increase youth interest, carefully  
10 considered findings of this research will be published via a media release article in The Conversation  
11 and on Twitter. Advocacy will be key to informing policy makers of regulatory and health issues that  
12 need to be addressed.  
13  
14

### 15 **IMPLICATIONS**

16  
17 Findings from this scoping review may have implications for electronic cigarette marketing regulation.  
18 Additionally the findings will inform various components of a research project investigating electronic  
19 cigarette discussion amongst Australian public Twitter accounts.  
20  
21

### 22 **AUTHORS' CONTRIBUTION**

23  
24 KM, JJ and BM conceptualised the research. KM drafted the protocol. JJ and BM aided in developing  
25 the research question and study methods, contributed meaningfully to editing, and approved the final  
26 manuscript.  
27  
28

### 29 **FUNDING STATEMENT**

30  
31 This work was supported by an Australian Government Research Training Program Scholarship.  
32

### 33 **COMPETING INTERESTS**

34  
35 None declared.  
36  
37  
38  
39  
40  
41  
42  
43  
44  
45  
46  
47  
48  
49  
50  
51  
52  
53  
54  
55  
56  
57  
58  
59  
60

## REFERENCES

1. Polosa R, Rodu B, Caponnetto P, et al. A fresh look at tobacco harm reduction: the case for the electronic cigarette. *Harm Reduction Journal* 2013;10(19):1-11.
2. Fagerström K, Bridgman K. Tobacco harm reduction: The need for new products that can compete with cigarettes. *Addict Behav.* 2014;39(3):507-11.
3. Pepper J, Emery S, Ribisl K, et al. How risky is it to use e-cigarettes? Smokers' beliefs about their health risks from using novel and traditional tobacco products. *J Behav Med.* 2015;38(2):318-26.
4. Tomaszewski A. The perceived effects of electronic cigarettes on health by adult users: A state of the science systematic literature review. *Journal of the American Association of Nurse Practitioners.* 2016;28(9):510-15.
5. Richardson A, Pearson J, Xiao H, et al. Prevalence, harm perceptions, and reasons for using noncombustible tobacco products among current and former smokers. *Am J Public Health.* 2014;104(8):1437-44.
6. Pepper J, Brewer N. Electronic nicotine delivery system (electronic cigarette) awareness, use, reactions and beliefs: a systematic review. *Tob Control.* 2013.
7. Benowitz N. Emerging nicotine delivery products: implications for public health. *Annals of the American Thoracic Society.* 2014;11(2):231-35.
8. Etter J, Bullen C. A longitudinal study of electronic cigarette users. *Addict Behav.* 2014;39(2):491-94.
9. Grana R, Popova L, Ling P. A longitudinal analysis of electronic cigarette use and smoking cessation. *JAMA Internal Medicine.* 2014;174(5):812-13.
10. Paek H, Kim S, Hove T, et al. Reduced harm or another gateway to smoking? Source, message, and information characteristics of E-cigarette videos on YouTube. *Journal of Health Communication.* 2014;19(5):545-60.
11. Colaizzi C, Tapias L, Cauley R, et al. Injuries caused by explosion of electronic cigarette devices. *Eplasty.* 2016;16:ic9.
12. Kumetz E, Hurst N, Cudnik R, et al. Electronic cigarette explosion injuries. *The American Journal of Emergency Medicine.* 2016;34(11):2252.e1-52.e3.
13. Hua M, Talbot P. Potential health effects of electronic cigarettes: a systematic review of case reports. *Preventive Medicine Reports.* 2016;4:169-78.
14. Rogers T. Electronic nicotine delivery systems (ENDS): New evidence from the State and Community Tobacco Control Research Initiative. *Tob Control.* 2014;23(suppl 3):iii1-iii2.
15. Vaper Empire. Premium electronic cigarette products and e liquids australia 2016 [Available from: <http://www.vaperempire.com.au/>].
16. Harrell M, Weaver S, Loukas A, et al. Flavored e-cigarette use: characterizing youth, young adult, and adult users. *Preventive Medicine Reports.* 2017;5:33-40.
17. Pepper J, Ribisl K, Brewer N. Adolescents' interest in trying flavoured e-cigarettes. *Tob Control.* 2016;25(Suppl 2):ii62-ii66.
18. Trehy M, Ye W, Hadwiger M, et al. Analysis of electronic cigarette cartridges, refill solutions, and smoke for nicotine and nicotine related impurities. *Journal of Liquid Chromatography & Related Technologies.* 2011;34(14):1442-58.
19. Trtchounian A, Talbot P. Electronic nicotine delivery systems: is there a need for regulation? *Tob Control.* 2011;20(1):47.
20. Goniewicz M, Kuma T, Gawron M, et al. Nicotine levels in electronic cigarettes. *Nicotine & Tobacco Research.* 2013;15(1):158-66.
21. Williams M, Talbot P. Variability among electronic cigarettes in the pressure drop, airflow rate, and aerosol production. *Nicotine & Tobacco Research.* 2011;13(12):1276-83.
22. Ballbè M, Martínez-Sánchez J, Sureda X, et al. Cigarettes vs. e-cigarettes: Passive exposure at home measured by means of airborne marker and biomarkers. *Environ Res.* 2014;135:76-80.
23. Fromme H, Schober W. Waterpipes and e-cigarettes: Impact of alternative smoking techniques on indoor air quality and health. *Atmos Environ.* 2015;106:429-41.
24. Pisinger C, Døssing M. A systematic review of health effects of electronic cigarettes. *Prev Med.* 2014;69:248-60.
25. Vlachopoulos C, Ioakeimidis N, Abdelrasoul M, et al. Electronic cigarette smoking increases aortic stiffness and blood pressure in young smokers. *J Am Coll Cardiol.* 2016;67(23):2802-03.
26. Wu Q, Jiang D, Minor M, et al. Electronic cigarette liquid increases inflammation and virus infection in primary human airway epithelial cells. *PLoS One.* 2014;9(9):e108342.

- 1
- 2
- 3 27. International Tobacco Control Policy Evaluation Project. About ITC Ontario, Canada
- 4 Department of Psychology, University of Waterloo; 2016 [Available from:
- 5 <http://www.itcproject.org/about>.
- 6 28. World Health Organization. WHO Framework Convention on Tobacco Control Geneva,
- 7 Switzerland: WHO; 2017 [Available from: <http://www.who.int/fctc/en/>].
- 8 29. International Tobacco Control Policy Evaluation Project. Countries Ontario, Canada:
- 9 Department of Psychology, University of Waterloo; 2016 [Available from:
- 10 <http://www.itcproject.org/countries>.
- 11 30. Gravely S, Fong G, Cummings K, et al. Awareness, trial, and current use of electronic
- 12 cigarettes in 10 countries: findings from the ITC Project. *Int J Environ Res Public Health*.
- 13 2014;11(11):11691-704.
- 14 31. King B, Alam S, Promoff G, et al. Awareness and ever use of electronic cigarettes among
- 15 U.S. adults, 2010–2011. *Nicotine & Tobacco Research*. 2013;15(9):1623-27.
- 16 32. Regan A, Promoff G, Dube S, et al. Electronic nicotine delivery systems: adult use and
- 17 awareness of the 'e-cigarette' in the USA. *Tob Control*. 2012;22(1):19.
- 18 33. Adkison S, O'Connor R, Bansal-Travers M, et al. Electronic nicotine delivery systems:
- 19 International tobacco control four-country survey. *Am J Prev Med*. 2013;44(3):207-15.
- 20 34. Quit Victoria. Legal status of electronic cigarettes in Australia. 2016.
- 21 35. Kornfield R, Huang J, Vera L, et al. Rapidly increasing promotional expenditures for e-
- 22 cigarettes. *Tob Control*. 2014.
- 23 36. de Andrade M, Hastings G, Angus K, et al. The marketing of electronic cigarettes in the UK.
- 24 Cancer Research UK; 2013.
- 25 37. Huang J, Kornfield R, Szczypka G, et al. A cross-sectional examination of marketing of
- 26 electronic cigarettes on twitter. *Tob Control*. 2014;23.
- 27 38. Bunnell R, Agaku I, Arrazola R, et al. Intentions to smoke cigarettes among never-smoking
- 28 U.S. middle and high school electronic cigarette users, National Youth Tobacco Survey, 2011-2013.
- 29 *Nicotine & Tobacco Research*. 2014.
- 30 39. Emery S, Vera L, Huang J, et al. Wanna know about vaping? Patterns of message exposure,
- 31 seeking and sharing information about e-cigarettes across media platforms. *Tob Control*.
- 32 2014;23(suppl 3):iii17-iii25.
- 33 40. Brandon T, Goniewicz M, Hanna N, et al. Electronic Nicotine Delivery Systems: A Policy
- 34 Statement From the American Association for Cancer Research and the American Society of Clinical
- 35 Oncology. *J Clin Oncol*. 2015;33(8):952-63.
- 36 41. World Health Organization. Electronic nicotine delivery systems. Moscow; 2014.
- 37 42. Bunnell R, Agaku I, Arrazola R, et al. Intentions to smoke cigarettes among never-smoking
- 38 US middle and high school electronic cigarette users: National Youth Tobacco Survey, 2011–2013.
- 39 *Nicotine & Tobacco Research*. 2015;17(2):228-35.
- 40 43. U.S. Department of Health and Human Services. Preventing tobacco use among youth and
- 41 young adults: a report of the Surgeon General. Atlanta, United States: Department of Health and
- 42 Human Services, Centers for Disease Control and Prevention, National Center for Chronic Disease
- 43 Prevention and Health Promotion, Office on Smoking and Health; 2012.
- 44 44. Ayers J, Ribisl K, Brownstein J. Tracking the rise in popularity of electronic nicotine delivery
- 45 systems (electronic cigarettes) using search query surveillance. *Am J Prev Med*. 2011;40(4):448-53.
- 46 45. Clark E, Jones C, Williams J, et al. Vaporous marketing: Uncovering pervasive electronic
- 47 cigarette advertisements on twitter. *PLoS One*. 2016;11(7).
- 48 46. Willis E, Haught M, Morris li D. Up in vapor: Exploring the health messages of e-cigarette
- 49 advertisements. *Health Communication*. 2016:1-9.
- 50 47. Richardson A, Ganz O, Vallone D. Tobacco on the web: surveillance and characterisation of
- 51 online tobacco and e-cigarette advertising. *Tob Control*. 2015;24(4):341-47.
- 52 48. Grana R, Ling P. "Smoking Revolution": A content analysis of electronic cigarette retail
- 53 websites. *Am J Prev Med*. 2014;46(4):395-403.
- 54 49. Arksey H, O'Malley L. Scoping studies: towards a methodological framework. *International*
- 55 *Journal of Social Research Methodology*. 2005;8(1):19-32.
- 56 50. Armstrong R, Hall B, Doyle J, et al. 'Scoping the scope' of a cochrane review. *Journal of*
- 57 *Public Health*. 2011;33(1):147-50.
- 58 51. Levac D, Colquhoun H, O'Brien KK. Scoping studies: advancing the methodology.
- 59 *Implementation Science*. 2010;5:69-69.
- 60 52. The Joanna Briggs Institute. Methodology for JBI scoping reviews. South Australia: The
- Joanna Briggs Institute, The University of Adelaide; 2015.

1  
2  
3 53. Consumer Advocates for Smoke Free Alternatives Association. Historical timeline of  
4 electronic cigarettes: CASAA; 2017 [Available from: [http://casaa.org/historical-timeline-of-electronic-](http://casaa.org/historical-timeline-of-electronic-cigarettes/)  
5 [cigarettes/](http://casaa.org/historical-timeline-of-electronic-cigarettes/).  
6

7 54. Covidence. Covidence 2017 [Available from: <https://www.covidence.org/>.  
8  
9  
10  
11  
12  
13  
14  
15  
16  
17  
18  
19  
20  
21  
22  
23  
24  
25  
26  
27  
28  
29  
30  
31  
32  
33  
34  
35  
36  
37  
38  
39  
40  
41  
42  
43  
44  
45  
46  
47  
48  
49  
50  
51  
52  
53  
54  
55  
56  
57  
58  
59  
60

For peer review only

1  
2  
3  
4  
5  
6  
7  
8  
9  
10  
11  
12  
13  
14  
15  
16  
17  
18  
19  
20  
21  
22  
23  
24  
25  
26  
27  
28  
29  
30  
31  
32  
33  
34  
35  
36  
37  
38  
39  
40  
41  
42  
43  
44  
45  
46  
47  
48  
49  
50  
51  
52  
53  
54  
55  
56  
57  
58  
59  
60

**Appendix I: Data extraction proforma**

|                                                 |
|-------------------------------------------------|
| Author(s)                                       |
| Year of publication                             |
| Origin/country of study                         |
| Aim/purpose of study                            |
| Media reported                                  |
| Sample size                                     |
| Study design/methods                            |
| Results                                         |
| Key findings that relate to the review question |

For peer review only

# BMJ Open

## The messages presented in online electronic cigarette promotions and discussions: A scoping review protocol

|                                 |                                                                                                                                                                                                                                                                                                                                           |
|---------------------------------|-------------------------------------------------------------------------------------------------------------------------------------------------------------------------------------------------------------------------------------------------------------------------------------------------------------------------------------------|
| Journal:                        | <i>BMJ Open</i>                                                                                                                                                                                                                                                                                                                           |
| Manuscript ID                   | bmjopen-2017-018633.R1                                                                                                                                                                                                                                                                                                                    |
| Article Type:                   | Protocol                                                                                                                                                                                                                                                                                                                                  |
| Date Submitted by the Author:   | 13-Sep-2017                                                                                                                                                                                                                                                                                                                               |
| Complete List of Authors:       | McCausland, Kahlia; Curtin University - Perth City Campus, Collaboration for Evidence, Research and Impact in Public Health, School of Public Health<br>Maycock, Bruce; Curtin University, School of Public Health<br>Jancey, Jonine; Curtin University, Western Australian Centre for Health Promotion Research, School of Public Health |
| <b>Primary Subject Heading</b>: | Public health                                                                                                                                                                                                                                                                                                                             |
| Secondary Subject Heading:      | Health policy, Research methods, Smoking and tobacco                                                                                                                                                                                                                                                                                      |
| Keywords:                       | Protocols & guidelines < HEALTH SERVICES ADMINISTRATION & MANAGEMENT, electronic cigarettes, PUBLIC HEALTH, public policy, social media, marketing                                                                                                                                                                                        |
|                                 |                                                                                                                                                                                                                                                                                                                                           |

SCHOLARONE™  
Manuscripts

1  
2  
3 **The messages presented in online electronic cigarette promotions and discussions: A scoping**  
4 **review protocol**  
5

6 Kahlia McCausland<sup>1</sup>

7 Bruce Maycock<sup>1</sup>

8 Jonine Jancey<sup>1</sup>  
9  
10

11  
12 1 Collaboration for Evidence, Research and Impact in Public Health, School of Public Health, Faculty  
13 of Health Science, Curtin University, Perth, Western Australia  
14

15  
16 Ms Kahlia McCausland (*Corresponding Author*)

17 Collaboration for Evidence, Research and Impact in Public Health, School of Public Health, Faculty of  
18 Health Science, Curtin University, Perth, Western Australia

19 Postal address: Collaboration for Evidence, Research and Impact in Public Health, School of Public  
20 Health, Curtin University, GPO Box U1987, Western Australia 6845, Australia  
21

22 Telephone: +61 08 9266 7382

23 Email: [kahlia.mccausland@curtin.edu.au](mailto:kahlia.mccausland@curtin.edu.au)  
24  
25

26  
27 Professor Bruce Maycock

28 Collaboration for Evidence, Research and Impact in Public Health, School of Public Health, Faculty of  
29 Health Science, Curtin University, Perth, Western Australia  
30

31  
32 Associate Professor Jonine Jancey

33 Collaboration for Evidence, Research and Impact in Public Health, School of Public Health, Faculty of  
34 Health Science, Curtin University, Perth, Western Australia  
35  
36

37  
38 Word count: 3312  
39  
40

41  
42 **ABSTRACT**  
43

44 **Introduction:** Electronic cigarettes have become increasingly popular over the last ten years. These  
45 devices represent a new paradigm for tobacco control offering smokers an opportunity to inhale  
46 nicotine without inhaling tobacco smoke. To date there are no definite conclusions regarding the  
47 safety and long term health effects of electronic cigarettes, however, there is evidence that they are  
48 being marketed online as a healthier alternative to traditional cigarettes. This scoping review aims to  
49 identify and describe the breadth of messages (e.g. health, smoking-cessation and price related  
50 claims) presented in online electronic cigarette promotions and discussions.  
51  
52

53  
54 **Methods and analysis:** A scoping review will be undertaken adhering to the methodology outlined in  
55 The Joanna Briggs Institute Manual for Scoping Reviews. Six key electronic databases will be  
56 searched to identify eligible studies. Studies must be published in English between 2007 and 2017,  
57  
58  
59  
60



1  
2  
3 examine and/or analyse content captured from online electronic cigarette promotions or discussions,  
4 and report results for electronic cigarettes separately to other forms of tobacco delivery. Studies will  
5 be screened initially by title and abstract, followed by full-text review. Results of the search strategy  
6 will be reported in a PRISMA flow diagram and presented in tabular form with accompanying narrative  
7 summary.  
8  
9

10 **Ethics and dissemination:** The methodology consists of reviewing and collecting data from publicly  
11 available studies, and therefore does not require ethics approval. Results will be published in a peer  
12 reviewed journal and be presented at national/international conferences. Additionally, findings will be  
13 disseminated via social media and online platforms. Advocacy will be key to informing policy makers  
14 of regulatory and health issues that need to be addressed.  
15  
16

17 **Registration details:** The review was registered prospectively with The Joanna Briggs Institute  
18 Systematic Reviews database.  
19  
20

### 21 **Strengths and limitations of this study**

- 22 • This is a nascent area of research in which the scoping review methodology supports the  
23 generation of evidence to increase understanding of how the online space is being used to  
24 promote and discuss electronic cigarettes.
- 25 • The review will adhere to the methodology outlined in the Manual for Scoping Reviews by The  
26 Joanna Briggs Institute.
- 27 • The review will not assess the quality of the evidence identified from the literature, rather  
28 provide an overview of the existing evidence, regardless of quality.
- 29 • The heterogeneity of content areas covered by this methodology may provide challenges in  
30 synthesising the results into succinct conclusions or recommendations.  
31  
32  
33  
34  
35

36 **KEYWORDS:** electronic cigarettes; marketing; social media; public health; public policy  
37  
38  
39  
40

## 41 **INTRODUCTION**

42  
43 The availability of less toxic forms of nicotine delivery represents a new paradigm for tobacco control,  
44 offering smokers an opportunity to inhale nicotine without inhaling tobacco smoke.[1, 2] The evident  
45 proliferation of alternative nicotine delivery devices, particularly electronic cigarettes, suggests that  
46 these devices may be perceived as a healthier alternative to traditional cigarettes.[3-5] However,  
47 there remains numerous unanswered questions regarding the overall public health benefits of these  
48 devices. Concerns have been raised about their effectiveness as a smoking cessation intervention,  
49 with dual use of cigarettes and electronic cigarettes potentially maintaining cigarette addiction;[6-9]  
50 their facilitation of smoking uptake among youth;[7, 10] the possible harms from device  
51 malfunctions;[11, 12] and the potential health risks associated with their use.[13] These issues  
52 underscore the urgent need for research that will inform policies and regulations for electronic  
53 cigarettes and other new and emerging nicotine delivery devices.  
54  
55  
56  
57  
58  
59  
60

1  
2  
3 Electronic cigarettes (also commonly known as e-cigarettes) are battery-powered devices that heat a  
4 solution, known as juice or e-liquid, typically containing nicotine, which generates a vapour for  
5 inhalation.[14] E-liquid is available in a range of flavours including butterscotch, cherry choc, and  
6 vanilla[15] which appeal to many youth.[16, 17] Studies have found wide variability in the level of  
7 nicotine delivered by these products,[18-20] device quality (airflow rate, aerosol production, leaking e-  
8 liquid cartridges) and labelling,[19, 21] and have connected electronic cigarette use with nicotine  
9 addiction, respiratory damage, aortic stiffness and intake of carcinogenic heavy metals.[22-26]

10  
11  
12  
13 The International Tobacco Control Policy Evaluation Project is the first international cohort study of  
14 tobacco use.[27] The project's objective is to measure the psychosocial and behavioural impact of key  
15 national level policies of the WHO Framework Convention on Tobacco Control.[28] It is a collaborative  
16 effort with international health organisations and policymakers in more than 25 countries thus far.[29]  
17 Data from the project has confirmed, as well as extended understanding of the level of awareness  
18 and use of electronic cigarettes in high-income countries.[30] The data are consistent with results  
19 from the HealthStyles[31] and ConsumerStyles[32] surveys conducted in the United States providing  
20 further evidence of increasing levels of electronic cigarette awareness and use over the last decade.  
21 Australian data from the International Tobacco Control Project have shown that awareness of  
22 electronic cigarettes increased from 20% in 2010 to 66% in 2013, and self-reported use from 1% in  
23 2010 to 7% in 2013,[33] even though the sale, purchase and marketing of electronic cigarettes was  
24 (and continues to be) prohibited.[34]

25  
26  
27  
28  
29  
30  
31 Regulation of electronic cigarettes differs among countries, ranging from no regulation, licensing as  
32 medicines, to complete prohibition.[35] For example, as of 2016 across the European Union electronic  
33 cigarettes cannot be advertised or promoted directly or indirectly, including via internet and  
34 commercial e-mail.[36] Similarly, the United States Food and Drug Administration recently extended  
35 its regulatory power to include electronic cigarettes, meaning they intend to regulate the marketing,  
36 labelling and manufacturing of these devices.[37, 38] Despite this, evidence suggests online  
37 marketing of electronic cigarettes continues.[39, 40]

38  
39  
40  
41  
42  
43  
44  
45  
46  
47  
48  
49  
50  
51  
52  
53  
54  
55  
56  
57  
58  
59  
60  
There is increasing evidence of substantial financial investment by tobacco and other industry groups  
using websites, social media and other non-traditional marketing methods to increase the electronic  
cigarette market.[10, 41, 42] In the United States and Canada alone over \$2 million is spent annually  
on online electronic cigarette advertising.[43] The online social networking service, Twitter, with 328  
million active monthly users[44] is regularly used as a promotional tool by electronic cigarette  
manufactures and retail outlets. For example, electronic cigarette tweets were found to increase 10-  
fold during 2009-2010, of which 93% were classified as advertising.[45] The rise of new media has  
enabled the tobacco industry to penetrate channels such as Twitter and YouTube with information  
offsetting tobacco control denormalisation strategies,[46, 47] of which the electronic cigarette industry  
is now capitalising on.[48]

Electronic cigarette companies are employing techniques previously used by the tobacco industry to  
influence young people's decision to use cigarettes.[49] These include the addition of sweet

1  
2  
3 flavourings to e-liquid and promoting products using youth-resonant themes, such as sex appeal,  
4 rebellion, social status and celebrity testimonials.[50, 51] In addition, electronic cigarettes are being  
5 advertised as a harm reduction alternative[10, 41] and promoted in a way to create a vaping culture  
6 that appeals to youth (even non-smokers),[52, 53] potentially supporting the creation of a whole new  
7 generation of nicotine addicted young people, normalising not only vaping but also renormalising  
8 smoking in public places, and serving as a gateway to tobacco use.[54-56]  
9

10  
11  
12 Consumer perceptions of electronic cigarettes' health risks and benefits are essential factors in  
13 determining uptake. Target groups adopting the product (past smokers, smokers attempting to quit,  
14 and youth) and patterns of use impact on population health. Tobacco product adoption patterns are  
15 motivated and supported by tobacco industry marketing,[57] it is therefore imperative to understand  
16 the marketing consumers contend with. The internet remains a main channel for marketing electronic  
17 cigarette products,[58] with electronic cigarette retail websites and social media accounts presenting  
18 an assortment of explicit and implicit marketing claims, most commonly with regard to claims of health  
19 benefits, being less harmful than tobacco, and being able to assist in quitting smoking.[43, 50, 59, 60]  
20  
21  
22  
23  
24  
25  
26  
27  
28  
29  
30  
31  
32  
33  
34  
35  
36  
37  
38  
39  
40  
41  
42  
43  
44  
45  
46  
47  
48  
49  
50  
51  
52  
53  
54  
55  
56  
57  
58  
59  
60

Very little is known about this emerging product, and there is a need for systematic research to  
understand the marketing drivers for the uptake of electronic cigarettes and how they are promoted  
and accessed online. Only through this understanding can appropriate policies and regulations be  
developed. This manuscript outlines a proposed methodology for a scoping review which aims to  
identify and describe the breadth of messages (e.g. health, smoking-cessation and price related  
claims) presented in online electronic cigarette promotions and discussions.

## **METHODS AND ANALYSIS**

### **Study design**

A scoping review will be undertaken to identify and describe the breadth of messages presented in  
online electronic cigarette promotions and discussions. Scoping reviews use a systematic process to  
map key concepts and types of evidence in an area of research and identify gaps in an existing body  
of knowledge.[61-63] Scoping reviews tend to differ from systematic reviews in a number of ways and  
typically do not assess the quality of the studies included.[61, 63] This scoping review will adhere to  
the methodologically rigorous methods manual by The Joanna Briggs Institute (JBI).[64] The scoping  
review frameworks proposed by Arksey and O'Malley,[61] and Levac, Colquhoun and O'Brien[63]  
have been drawn upon in the development of the JBI methodology for scoping reviews. The JBI  
scoping review methodology consists of five parts: 1) Title, objective, and question; 2) Inclusion  
criteria; 3) Search strategy; 4) Extraction of the results; 5) Presentation of the results.

A preliminary search of the literature was conducted in the following databases: JBI Database of  
Scoping Reviews and Implementation Reports, Cochrane Database of Systematic Reviews,  
PROSPERO International Prospective Register of Systematic Reviews, Database of Promoting  
Health Effectiveness Reviews (DoPHER) and Epistemonikos which confirmed that no systematic or

1  
2  
3 scoping review has been published or is currently underway on this topic. The review was  
4 prospectively registered with the JBI Systematic Reviews database (5 May 2017). It is anticipated that  
5 the scoping review will commence September 2017 with data extraction completed by November. We  
6 aim to submit the findings of the review in the form of a manuscript for peer review by the end of  
7 January 2018.  
8  
9

### 10 **Title, objective, and question**

11  
12 Review title: *The messages presented in online electronic cigarette promotions and discussions: A*  
13 *scoping review protocol*. The title was guided by the "PCC" mnemonic (Population, Concept, and  
14 Context).[64] Using the PCC mnemonic enables the title to reflect key information about the focus and  
15 scope of the review to impending readers.  
16  
17

18 Review objective: *This scoping review will identify and describe the breadth of messages presented in*  
19 *online electronic cigarette promotions and discussions*. The review objective is congruent with the title  
20 and specifies what the review aims to achieve.  
21  
22

23 Review question: *What messages are presented in online electronic cigarette promotions and*  
24 *discussions?* The review objective includes the PCC elements and guides and directs the  
25 development of the inclusion criteria for the scoping review.  
26  
27

### 28 **Inclusion criteria**

29  
30 This scoping review will include studies that have examined and analysed content captured from  
31 online electronic cigarette promotions and discussions (e.g. social media: YouTube, Facebook,  
32 Instagram, Twitter, blogs; and websites: retail sites, discussion forums). The media reported in the  
33 study must be clearly identified (e.g. analysis of tweets from Twitter). Studies reporting multiple media  
34 will be excluded (e.g. analysis of tweets and posts from Twitter and Facebook respectively) unless the  
35 results for each media are reported separately. Other tobacco product studies (e.g. traditional tobacco  
36 cigarette, snus, chewing tobacco or hookah) will be excluded unless electronic cigarettes are also  
37 examined in the study and reported separately. In addition, studies that do not distinguish between  
38 electronic cigarettes and other forms of tobacco delivery will be excluded. Studies examining  
39 promotions or discussions in traditional media (e.g. TV, newspaper, and magazine) will be excluded  
40 unless online media is also examined in the study and reported separately. Studies will be limited to  
41 the following countries: United Kingdom, United States, New Zealand, Australia, and Canada. These  
42 countries have been selected as they are all developed countries and electronic cigarette use is well  
43 established.[29] The review will consider only peer reviewed primary research studies. Systematic  
44 and literature reviews, grey literature, editorials and thesis publications will be excluded.  
45  
46  
47  
48  
49  
50  
51

### 52 **Search strategy**

53  
54 The search strategy aims to identify peer reviewed primary research studies. Consultation with the  
55 Faculty Librarian identified five key databases: Medline, Scopus, ProQuest, Informit, and Google  
56 Scholar. The research question crosses subject areas, hence the Medline, Scopus, Informit and  
57 ProQuest databases were identified due to their multidisciplinary nature and broad scope. Google  
58  
59  
60

Scholar will provide a sound overview of what published material exists on the topic. A hand search of the Journal of Medical Internet Research will also be conducted to ensure no studies meeting the inclusion criteria are missed. Preliminary searches have located numerous articles published in this journal that are relevant to the review question. The first 200 results from Google Scholar will be examined for eligibility and subject to the screening process outlined below.

An initial search of Medline was undertaken, followed by an analysis of the text words contained in the title, abstract, and index terms used to describe the articles. This informed the development of the search strategy, including identified keywords and index terms. A comprehensive search using all the identified keywords and index terms will be undertaken across all databases. Lastly, the reference list of all articles subject to full text review will be screened for additional studies and assessed for suitability based on the studies title and abstract.

The search will be limited to studies published in English in the last ten years (2007-2017), this period correlates with the approximate time that electronic cigarettes were first introduced to the United States and Europe.[65] The primary reviewer (KM) will contact authors of primary research studies if access to full text cannot be obtained. Studies reported as abstracts or for which full texts cannot be identified will be excluded from the review.

The initial search terms are: (“electronic cigarette” OR e-cigarette OR “electronic nicotine delivery system” OR “personal vapo?ri?er” OR “electronic nicotine delivery device” OR “vape pen” OR “smokeless tobacco” OR “electric cigarette” OR “electric nicotine delivery system” OR “electric nicotine delivery device” OR e-hookah OR e-juice OR e-liquid OR vaping) AND (“social media” OR internet OR online OR YouTube OR Facebook OR Instagram OR Twitter OR “online media” OR website OR e-mail OR blog OR “digital media” OR “social networking”) AND (“content analysis” OR “content evaluation” OR message OR meaning OR coding OR “media analysis” OR “textual analysis”). A transcript of a draft search strategy conducted in Medline is provided in Appendix I.

Retrieved citations from each database will be imported into EndNote X7 [66] reference management software, with duplicate citations removed before being imported into Covidence.[67] Covidence is a not-for-profit service working in partnership with Cochrane to improve the production and use of systematic reviews for health and wellbeing. Covidence is a web-based software platform that streamlines the production of systematic reviews by supporting the key steps in the review process such as citation screening; full text review; risk of bias assessment; extraction of study characteristics and outcomes; and export of data and references.[67]

### **Study selection**

Studies will be assessed for inclusion based on the inclusion criteria, examined initially by title and abstract. Full text articles will be retrieved if they appear to meet the inclusion criteria or if further examination is required to determine eligibility. Two reviewers (KM and JJ) will independently screen all titles/abstracts to determine their eligibility. Full text screening will then be undertaken by the primary reviewer to further determine study eligibility for inclusion in the review. This process will be

1  
2  
3 assisted by the online screening and data extraction tool – Covidence.[67] Any disagreements will be  
4 resolved through discussion with a third reviewer (BM).  
5

### 6 7 **Extraction of the results**

8 The relevant content from each study will be extracted using a data extraction proforma (Appendix II).  
9 Data extracted will include: Author(s), year of publication, origin/country of study, aim/purpose of  
10 study, media reported, sample size, study design/methods, results, and key findings that relate to the  
11 review question. There will be no attempt to contact authors of primary research studies for which  
12 extraction information is not reported. Primary outcome data will include the type of media being  
13 reported (e.g. Twitter or retail website), and the sentiment (positive, negative and neutral) and theme  
14 (e.g. cessation, flavour, discount) of the messages presented. Reporting on these outcomes will  
15 satisfy the aim of this scoping review. Secondary outcome data that will be extracted if reported on is  
16 author categorisation (e.g. community group, tobacco company).  
17

18 To ensure inter-rater reliability, two reviewers (KM and JJ) independent of one another will chart the  
19 first five studies using the data extraction proforma and meet to determine whether their approach to  
20 data extraction is consistent with the research question and purpose. In addition this process will be  
21 used to refine and/or expand the data extraction proforma to ensure all relevant results are being  
22 extracted. Any changes made to the data extraction proforma will be reported on in the results  
23 publication. The primary reviewer will then extract data from the remaining studies unaccompanied.  
24

### 25 26 27 **Presentation of the results**

28 The results of the search strategy will be presented in a PRISMA flow diagram indicating the number  
29 of articles found via each search method, the number of duplicates removed, and the number of  
30 studies excluded and included. A list of studies excluded after full text screening will be made  
31 available along with the main reason for exclusion.  
32

33 To illustrate and summarise the main findings, results will be presented in tabular form (as per data  
34 extraction proforma), with an accompanying narrative summary describing how the results relate to  
35 the review objective and question.  
36

### 37 38 39 **ETHICS AND DISSEMINATION**

40 The scoping review methodology consists of reviewing and collecting data from publicly available  
41 peer reviewed articles, therefore this study does not require ethics approval.  
42

43 The results of the scoping review will be published in a peer reviewed journal and presented at  
44 national/international conferences and symposia. Additionally, findings will be distributed via  
45 academic, research and community publication, and news and social media platforms, such as The  
46 Conversation, Research Gate and Twitter, in order to increase circulation. Advocacy, such as  
47 discussions with, and presentations to professional associations will be key to informing policy makers  
48 of regulatory and health issues that need to be addressed. The expertise of the research team (health  
49 promotion, public health, knowledge translation) will support broad dissemination of the findings.  
50  
51  
52  
53  
54  
55  
56  
57  
58  
59  
60



## IMPLICATIONS

Findings from this scoping review will increase understanding of the types of electronic cigarette promotion and discussions occurring online. This may provide evidence that will inform the need for advertising restrictions, as well as stimulate further research to understand and combat the proliferation of this online advertising. Additionally the findings will inform various components of a research project investigating electronic cigarette discussion amongst Australian Twitter users. This study will access public Australian Twitter data through TrISMA (Tracking Infrastructure for Social Media Analysis),[68] a powerful new framework for tracking, storing, and processing social media communication activities of Australian users. The study aims to compare electronic cigarette Twitter discussion in 2012, 2014 and 2016 using a triaxial classification scheme to capture tweet sentiment, theme and author category.

## AUTHORS' CONTRIBUTION

KM, JJ and BM conceptualised the research. KM drafted the protocol. JJ and BM aided in developing the research question and study methods, contributed meaningfully to editing, and approved the final manuscript.

## FUNDING STATEMENT

This work was supported by an Australian Government Research Training Program Scholarship. The Scholarship is provided by the Commonwealth of Australia to support general living costs for students undertaking Research Doctorate studies. The funder is not involved in any aspect of the project and will have no input on the interpretation or publication of the study results.

## COMPETING INTERESTS

None declared.



## REFERENCES

1. Polosa R, Rodu B, Caponnetto P, et al. A fresh look at tobacco harm reduction: the case for the electronic cigarette. *Harm Reduction Journal* 2013;10(19):1-11.
2. Fagerström K, Bridgman K. Tobacco harm reduction: The need for new products that can compete with cigarettes. *Addict Behav.* 2014;39(3):507-11.
3. Pepper J, Emery S, Ribisl K, et al. How risky is it to use e-cigarettes? Smokers' beliefs about their health risks from using novel and traditional tobacco products. *J Behav Med.* 2015;38(2):318-26.
4. Tomaszewski A. The perceived effects of electronic cigarettes on health by adult users: A state of the science systematic literature review. *Journal of the American Association of Nurse Practitioners.* 2016;28(9):510-15.
5. Richardson A, Pearson J, Xiao H, et al. Prevalence, harm perceptions, and reasons for using noncombustible tobacco products among current and former smokers. *Am J Public Health.* 2014;104(8):1437-44.
6. Pepper J, Brewer N. Electronic nicotine delivery system (electronic cigarette) awareness, use, reactions and beliefs: a systematic review. *Tob Control.* 2013.
7. Benowitz N. Emerging nicotine delivery products: implications for public health. *Annals of the American Thoracic Society.* 2014;11(2):231-35.
8. Etter J, Bullen C. A longitudinal study of electronic cigarette users. *Addict Behav.* 2014;39(2):491-94.
9. Grana R, Popova L, Ling P. A longitudinal analysis of electronic cigarette use and smoking cessation. *JAMA Internal Medicine.* 2014;174(5):812-13.
10. Paek H, Kim S, Hove T, et al. Reduced harm or another gateway to smoking? Source, message, and information characteristics of e-cigarette videos on YouTube. *J Health Commun.* 2014;19(5):545-60.
11. Colaianni C, Tapias L, Cauley R, et al. Injuries caused by explosion of electronic cigarette devices. *Eplasty.* 2016;16:ic9.
12. Kumetz E, Hurst N, Cudnik R, et al. Electronic cigarette explosion injuries. *The American Journal of Emergency Medicine.* 2016;34(11):2252.e1-52.e3.
13. Hua M, Talbot P. Potential health effects of electronic cigarettes: a systematic review of case reports. *Preventive Medicine Reports.* 2016;4:169-78.
14. Rogers T. Electronic nicotine delivery systems (ENDS): New evidence from the State and Community Tobacco Control Research Initiative. *Tob Control.* 2014;23(suppl 3):iii1-iii2.
15. Vaper Empire. Premium electronic cigarette products and e liquids Australia 2016 [Available from: <http://www.vaperempire.com.au/>].
16. Harrell M, Weaver S, Loukas A, et al. Flavored e-cigarette use: characterizing youth, young adult, and adult users. *Preventive Medicine Reports.* 2017;5:33-40.
17. Pepper J, Ribisl K, Brewer N. Adolescents' interest in trying flavoured e-cigarettes. *Tob Control.* 2016;25(Suppl 2):ii62-ii66.
18. Trehy M, Ye W, Hadwiger M, et al. Analysis of electronic cigarette cartridges, refill solutions, and smoke for nicotine and nicotine related impurities. *Journal of Liquid Chromatography & Related Technologies.* 2011;34(14):1442-58.
19. Trtchounian A, Talbot P. Electronic nicotine delivery systems: is there a need for regulation? *Tob Control.* 2011;20(1):47-52.
20. Goniewicz M, Kuma T, Gawron M, et al. Nicotine levels in electronic cigarettes. *Nicotine & Tobacco Research.* 2013;15(1):158-66.
21. Williams M, Talbot P. Variability among electronic cigarettes in the pressure drop, airflow rate, and aerosol production. *Nicotine & Tobacco Research.* 2011;13(12):1276-83.
22. Ballbè M, Martínez-Sánchez J, Sureda X, et al. Cigarettes vs. e-cigarettes: Passive exposure at home measured by means of airborne marker and biomarkers. *Environ Res.* 2014;135:76-80.

- 1  
2  
3 23. Fromme H, Schober W. Waterpipes and e-cigarettes: Impact of alternative smoking  
4 techniques on indoor air quality and health. *Atmos Environ*. 2015;106:429-41.  
5 24. Pisinger C, Døssing M. A systematic review of health effects of electronic cigarettes. *Prev*  
6 *Med*. 2014;69:248-60.  
7 25. Vlachopoulos C, Ioakeimidis N, Abdelrasoul M, et al. Electronic cigarette smoking increases  
8 aortic stiffness and blood pressure in young smokers. *J Am Coll Cardiol*. 2016;67(23):2802-03.  
9 26. Wu Q, Jiang D, Minor M, et al. Electronic cigarette liquid increases inflammation and virus  
10 infection in primary human airway epithelial cells. *PLoS One*. 2014;9(9):e108342.  
11 27. International Tobacco Control Policy Evaluation Project. About ITC. Ontario, Canada  
12 Department of Psychology, University of Waterloo; 2016 [Available from:  
13 <http://www.itcproject.org/about>.  
14 28. World Health Organization. WHO Framework Convention on Tobacco Control Geneva,  
15 Switzerland: WHO; 2017 [Available from: <http://www.who.int/fctc/en/>.  
16 29. International Tobacco Control Policy Evaluation Project. Countries. Ontario, Canada:  
17 Department of Psychology, University of Waterloo; 2016 [Available from:  
18 <http://www.itcproject.org/countries>.  
19 30. Gravely S, Fong G, Cummings K, et al. Awareness, trial, and current use of electronic  
20 cigarettes in 10 countries: findings from the ITC Project. *Int J Environ Res Public Health*.  
21 2014;11(11):11691-704.  
22 31. King B, Alam S, Promoff G, et al. Awareness and ever use of electronic cigarettes among U.S.  
23 adults, 2010–2011. *Nicotine & Tobacco Research*. 2013;15(9):1623-27.  
24 32. Regan A, Promoff G, Dube S, et al. Electronic nicotine delivery systems: adult use and  
25 awareness of the 'e-cigarette' in the USA. *Tob Control*. 2012;22:19-23.  
26 33. Adkison S, O'Connor R, Bansal-Travers M, et al. Electronic nicotine delivery systems:  
27 International tobacco control four-country survey. *Am J Prev Med*. 2013;44(3):207-15.  
28 34. Quit Victoria. E-cigarettes. 2017 [Available from: <https://www.quit.org.au/resources/policy-advocacy/policy/e-cigarettes/>.  
29 35. Beard E, Shahab L, Cummings D, et al. New pharmacological agents to aid smoking cessation  
30 and tobacco harm reduction: What has been investigated, and what is in the pipeline? *CNS Drugs*.  
31 2016;30(10):951-83.  
32 36. Department of Health UK. Article 20(5), Tobacco Products Directive: restrictions on  
33 advertising electronic cigarettes United Kingdom 2016 [Available from:  
34 [https://www.gov.uk/government/publications/proposals-for-uk-law-on-the-advertising-of-e-  
35 cigarettes/publishing-20-may-not-yet-complete](https://www.gov.uk/government/publications/proposals-for-uk-law-on-the-advertising-of-e-cigarettes/publishing-20-may-not-yet-complete).  
36 37. U.S. Department of Health and Human Services. The facts on the FDA's new tobacco rule  
37 Silver Spring, MD: U.S Food & Drug Administration 2016 [Available from:  
38 <https://www.fda.gov/ForConsumers/ConsumerUpdates/ucm506676.htm>.  
39 38. U.S. Department of Health and Human Services. Deeming tobacco products to be subject to  
40 the Federal Food, Drug, and Cosmetic Act, as amended by the Family Smoking Prevention and  
41 Tobacco Control Act; restrictions on the sale and distribution of tobacco products and required  
42 warning statements for tobacco products. *The Daily Journal of the United States Government*.  
43 2016;81(90):28973-9106.  
44 39. Lee A, Hart J, Sears C, et al. A picture is worth a thousand words: Electronic cigarette content  
45 on Instagram and Pinterest. *Tobacco Prevention & Cessation*. 2017;3:119-28.  
46 40. Kirkpatrick M, Cruz T, Goldenson N, et al. Electronic cigarette retailers use Pokémon Go to  
47 market products. *Tob Control*. 2017;0:1-3.  
48 41. de Andrade M, Hastings G, Angus K, et al. The marketing of electronic cigarettes in the UK.  
49 Cancer Research UK; 2013.  
50 42. Huang J, Kornfield R, Szczytko G, et al. A cross-sectional examination of marketing of  
51 electronic cigarettes on twitter. *Tob Control*. 2014;23:iii26-iii30.  
52  
53  
54  
55  
56  
57  
58  
59  
60

- 1
- 2
- 3 43. Richardson A, Ganz O, Vallone D. Tobacco on the web: Surveillance and characterisation of
- 4 online tobacco and e-cigarette advertising. *Tob Control*. 2015;24(4):341-47.
- 5 44. Statista. Number of monthly active Twitter users worldwide from 1st quarter 2010 to 2nd
- 6 quarter 2017 2017 [Available from: [https://www.statista.com/statistics/282087/number-of-](https://www.statista.com/statistics/282087/number-of-monthly-active-twitter-users/)
- 7 [monthly-active-twitter-users/](https://www.statista.com/statistics/282087/number-of-monthly-active-twitter-users/)].
- 8 45. Myslín M, Zhu S, Chapman W, et al. Using twitter to examine smoking behavior and
- 9 perceptions of emerging tobacco products. *J Med Internet Res*. 2013;15(8):e174.
- 10 46. Freeman B. New media and tobacco control. *Tob Control*. 2012;21(2):139-44.
- 11 47. Liang Y, Zheng X, Zeng D, et al. Exploring how the tobacco industry presents and promotes
- 12 itself in social media. *J Med Internet Res*. 2015;17(1):e24.
- 13 48. Payne J, Orellana-Barrios M, Medrano-Juarez R, et al. Electronic cigarettes in the media.
- 14 *Proceedings (Baylor University Medical Center)*. 2016;29(3):280-83.
- 15 49. U.S. Department of Health and Human Services. 2012 Surgeon General's Report—Preventing
- 16 tobacco use among youth and young adults. Atlanta, GA: US Department of Health and Human
- 17 Services, CDC; 2012.
- 18 50. Grana R, Ling P. "Smoking revolution": A content analysis of electronic cigarette retail
- 19 websites. *Am J Prev Med*. 2014;46(4):395-403.
- 20 51. Truth Initiative. Vaporized: e-cigarettes, advertising, and youth. Washington, DC: Truth
- 21 Initiative; 2015.
- 22 52. Bunnell R, Agaku I, Arrazola R, et al. Intentions to smoke cigarettes among never-smoking
- 23 U.S. middle and high school electronic cigarette users, National Youth Tobacco Survey, 2011-2013.
- 24 *Nicotine & Tobacco Research*. 2014;14(2):228-35.
- 25 53. Emery S, Vera L, Huang J, et al. Wanna know about vaping? Patterns of message exposure,
- 26 seeking and sharing information about e-cigarettes across media platforms. *Tob Control*.
- 27 2014;23(suppl 3):iii17-iii25.
- 28 54. Brandon T, Goniewicz M, Hanna N, et al. Electronic Nicotine Delivery Systems: A Policy
- 29 Statement From the American Association for Cancer Research and the American Society of Clinical
- 30 Oncology. *J Clin Oncol*. 2015;33(8):952-63.
- 31 55. World Health Organization. Electronic nicotine delivery systems. Moscow; 2014.
- 32 56. Bunnell R, Agaku I, Arrazola R, et al. Intentions to smoke cigarettes among never-smoking US
- 33 middle and high school electronic cigarette users: National Youth Tobacco Survey, 2011–2013.
- 34 *Nicotine & Tobacco Research*. 2015;17(2):228-35.
- 35 57. U.S. Department of Health and Human Services. Preventing tobacco use among youth and
- 36 young adults: a report of the Surgeon General. Atlanta, United States: Department of Health and
- 37 Human Services, Centers for Disease Control and Prevention, National Center for Chronic Disease
- 38 Prevention and Health Promotion, Office on Smoking and Health; 2012.
- 39 58. Ayers J, Ribisl K, Brownstein J. Tracking the rise in popularity of electronic nicotine delivery
- 40 systems (electronic cigarettes) using search query surveillance. *Am J Prev Med*. 2011;40(4):448-53.
- 41 59. Clark E, Jones C, Williams J, et al. Vaporous marketing: Uncovering pervasive electronic
- 42 cigarette advertisements on twitter. *PLoS One*. 2016;11(7):e0157304.
- 43 60. Willis E, Haught M, Morris I D. Up in vapor: Exploring the health messages of e-cigarette
- 44 advertisements. *Health Communication*. 2016;32(3):372-80.
- 45 61. Arksey H, O'Malley L. Scoping studies: towards a methodological framework. *International*
- 46 *Journal of Social Research Methodology*. 2005;8(1):19-32.
- 47 62. Armstrong R, Hall B, Doyle J, et al. 'Scoping the scope' of a cochrane review. *Journal of Public*
- 48 *Health*. 2011;33(1):147-50.
- 49 63. Levac D, Colquhoun H, O'Brien KK. Scoping studies: advancing the methodology.
- 50 *Implementation Science*. 2010;5:69-69.
- 51 64. The Joanna Briggs Institute. Methodology for JBI scoping reviews. South Australia: The
- 52 Joanna Briggs Institute, The University of Adelaide; 2015.
- 53
- 54
- 55
- 56
- 57
- 58
- 59
- 60

- 1  
2  
3 65. Consumer Advocates for Smoke Free Alternatives Association. Historical timeline of  
4 electronic cigarettes: CASAA; 2017 [Available from: [http://casaa.org/historical-timeline-of-](http://casaa.org/historical-timeline-of-electronic-cigarettes/)  
5 [electronic-cigarettes/](http://casaa.org/historical-timeline-of-electronic-cigarettes/).  
6  
7 66. Clarivate Analytics. EndNote. Clarivate Analytics; 2016.  
8 67. Covidence. Covidence 2017 [Available from: <https://www.covidence.org/>.  
9  
10 68. Bruns A, Burgess J, Banks J, et al. TrISMA: Tracking Infrastructure for Social Media Analysis  
11 2016 [Available from: <http://trisma.org/>.  
12  
13  
14  
15  
16  
17  
18  
19  
20  
21  
22  
23  
24  
25  
26  
27  
28  
29  
30  
31  
32  
33  
34  
35  
36  
37  
38  
39  
40  
41  
42  
43  
44  
45  
46  
47  
48  
49  
50  
51  
52  
53  
54  
55  
56  
57  
58  
59  
60

For peer review only

**Appendix I: Draft MEDLINE search – Ovid interface**

1. ("electronic cigarette" or e-cigarette or "electronic nicotine delivery system" or "personal vapo\$ri\$er" or "electronic nicotine delivery device" or "vape pen" or "smokeless tobacco" or "electric cigarette" or "electric nicotine delivery system" or "electric nicotine delivery device" or e-hookah or e-juice or e-liquid or vaping).ab.
2. ("social media" or internet or online or YouTube or Facebook or Instagram or Twitter or "online media" or website or e-mail or blog or "digital media" or "social networking").af.
3. ("content analysis" or "content evaluation" or message or meaning or coding or "media analysis" or "textual analysis").af.
4. 1 and 2 and 3
5. Limit 4 to yr="2007 – 2017"

For peer review only

**Appendix II: Data extraction proforma**

|                                                 |
|-------------------------------------------------|
| Author(s)                                       |
| Year of publication                             |
| Origin/country of study                         |
| Aim/purpose of study                            |
| Media reported                                  |
| Sample size                                     |
| Study design/methods                            |
| Results                                         |
| Key findings that relate to the review question |

**PRISMA-P (Preferred Reporting Items for Systematic review and Meta-Analysis Protocols) 2015 checklist: recommended items to address in a systematic review protocol\***

| Section and topic                 | Item No | Checklist item                                                                                                                                                                                                                                                |
|-----------------------------------|---------|---------------------------------------------------------------------------------------------------------------------------------------------------------------------------------------------------------------------------------------------------------------|
| <b>ADMINISTRATIVE INFORMATION</b> |         |                                                                                                                                                                                                                                                               |
| Title:                            |         |                                                                                                                                                                                                                                                               |
| Identification                    | 1a      | Identify the report as a protocol of a systematic review<br>Title page and page 1.                                                                                                                                                                            |
| Update                            | 1b      | If the protocol is for an update of a previous systematic review, identify as such<br>Not applicable.                                                                                                                                                         |
| Registration                      | 2       | If registered, provide the name of the registry (such as PROSPERO) and registration number<br>Page 5 paragraph 1. Registration with the JBI Systematic Reviews database does not provide a registration number and includes registration for scoping reviews. |
| Authors:                          |         |                                                                                                                                                                                                                                                               |
| Contact                           | 3a      | Provide name, institutional affiliation, e-mail address of all protocol authors; provide physical mailing address of corresponding author<br>Page 1.                                                                                                          |
| Contributions                     | 3b      | Describe contributions of protocol authors and identify the guarantor of the review<br>Page 8 – Authors' contribution.                                                                                                                                        |
| Amendments                        | 4       | If the protocol represents an amendment of a previously completed or published protocol, identify as such and list changes; otherwise, state plan for documenting important protocol amendments<br>Not applicable.                                            |
| Support:                          |         |                                                                                                                                                                                                                                                               |
| Sources                           | 5a      | Indicate sources of financial or other support for the review<br>Page 8 – Funding statement.                                                                                                                                                                  |
| Sponsor                           | 5b      | Provide name for the review funder and/or sponsor<br>Page 8 – Funding statement.                                                                                                                                                                              |
| Role of sponsor or funder         | 5c      | Describe roles of funder(s), sponsor(s), and/or institution(s), if any, in developing the protocol<br>Page 8 – Funding statement.                                                                                                                             |
| <b>INTRODUCTION</b>               |         |                                                                                                                                                                                                                                                               |
| Rationale                         | 6       | Describe the rationale for the review in the context of what is already known<br>Pages 2-4.                                                                                                                                                                   |
| Objectives                        | 7       | Provide an explicit statement of the question(s) the review will address with reference to participants, interventions, comparators, and outcomes (PICO)                                                                                                      |



Page 5 – Title, objective, and question. Uses PCC (Population, Concept, and Context) mnemonic rather than PICO as per JBI methodology for scoping reviews.

## METHODS

|                                    |     |                                                                                                                                                                                                                                                                     |
|------------------------------------|-----|---------------------------------------------------------------------------------------------------------------------------------------------------------------------------------------------------------------------------------------------------------------------|
| Eligibility criteria               | 8   | Specify the study characteristics (such as PICO, study design, setting, time frame) and report characteristics (such as years considered, language, publication status) to be used as criteria for eligibility for the review<br>Page 5 – Inclusion criteria.       |
| Information sources                | 9   | Describe all intended information sources (such as electronic databases, contact with study authors, trial registers or other grey literature sources) with planned dates of coverage<br>Page 5-6 – Search strategy.                                                |
| Search strategy                    | 10  | Present draft of search strategy to be used for at least one electronic database, including planned limits, such that it could be repeated<br>Supplementary file I and page 6 paragraph 4.                                                                          |
| Study records:                     |     |                                                                                                                                                                                                                                                                     |
| Data management                    | 11a | Describe the mechanism(s) that will be used to manage records and data throughout the review<br>Page 6 paragraph 5.                                                                                                                                                 |
| Selection process                  | 11b | State the process that will be used for selecting studies (such as two independent reviewers) through each phase of the review (that is, screening, eligibility and inclusion in meta-analysis)<br>Page 6-7 – Study selection.                                      |
| Data collection process            | 11c | Describe planned method of extracting data from reports (such as piloting forms, done independently, in duplicate), any processes for obtaining and confirming data from investigators<br>Page 7 – Extraction of the results.                                       |
| Data items                         | 12  | List and define all variables for which data will be sought (such as PICO items, funding sources), any pre-planned data assumptions and simplifications<br>Page 7 – Extraction of the results – and supplementary file II.                                          |
| Outcomes and prioritization        | 13  | List and define all outcomes for which data will be sought, including prioritization of main and additional outcomes, with rationale<br>Page 7 paragraph 2. Please note that intervention research will not be reviewed in this scoping review.                     |
| Risk of bias in individual studies | 14  | Describe anticipated methods for assessing risk of bias of individual studies, including whether this will be done at the outcome or study level, or both; state how this information will be used in data synthesis                                                |
| Data synthesis                     | 15a | Describe criteria under which study data will be quantitatively synthesised<br>Not applicable.                                                                                                                                                                      |
|                                    | 15b | If data are appropriate for quantitative synthesis, describe planned summary measures, methods of handling data and methods of combining data from studies, including any planned exploration of consistency (such as $I^2$ , Kendall's $\tau$ )<br>Not applicable. |
|                                    | 15c | Describe any proposed additional analyses (such as sensitivity or subgroup analyses, meta-regression)                                                                                                                                                               |

1  
2  
3  
4  
5  
6  
7  
8  
9  
10  
11  
12  
13  
14  
15  
16  
17  
18  
19  
20  
21  
22  
23  
24  
25  
26  
27  
28  
29  
30  
31  
32  
33  
34  
35  
36  
37  
38  
39  
40  
41  
42  
43  
44  
45  
46  
47

Not applicable.

15d If quantitative synthesis is not appropriate, describe the type of summary planned

Page 7 – Presentation of the results.

---

|               |    |                                                                                                                               |
|---------------|----|-------------------------------------------------------------------------------------------------------------------------------|
| Meta-bias(es) | 16 | Specify any planned assessment of meta-bias(es) (such as publication bias across studies, selective reporting within studies) |
|---------------|----|-------------------------------------------------------------------------------------------------------------------------------|

Not applicable.

---

|                                   |    |                                                                                    |
|-----------------------------------|----|------------------------------------------------------------------------------------|
| Confidence in cumulative evidence | 17 | Describe how the strength of the body of evidence will be assessed (such as GRADE) |
|-----------------------------------|----|------------------------------------------------------------------------------------|

Not applicable.

---

**\* It is strongly recommended that this checklist be read in conjunction with the PRISMA-P Explanation and Elaboration (cite when available) for important clarification on the items. Amendments to a review protocol should be tracked and dated. The copyright for PRISMA-P (including checklist) is held by the PRISMA-P Group and is distributed under a Creative Commons Attribution Licence 4.0.**

*From: Shamseer L, Moher D, Clarke M, Ghersi D, Liberati A, Petticrew M, Shekelle P, Stewart L, PRISMA-P Group. Preferred reporting items for systematic review and meta-analysis protocols (PRISMA-P) 2015: elaboration and explanation. BMJ. 2015 Jan 2;349(jan02 1):g7647.*
