# Supplementary material for: The messages presented in online electronic cigarette promotions and discussions: a scoping review protocol
Source: PubMed Central journal article supplement — BMJ Open. 2017 Nov 8;7(11):e018633. doi: 10.1136/bmjopen-2017-018633 (PMC5695349; doi:10.1136/bmjopen-2017-018633), 2017-11-08
Supplement: bmjopen-2017-018633supp002.pdf [file bmjopen-2017-018633supp002.pdf]

## Appendix II: Data extraction proforma

|                                                 |
|-------------------------------------------------|
| Author(s)                                       |
| Year of publication                             |
| Origin/country of study                         |
| Aim/purpose of study                            |
| Media reported                                  |
| Sample size                                     |
| Study design/methods                            |
| Results                                         |
| Key findings that relate to the review question |
